# Supplementary material
Source: PubMed Central journal article supplement (PMC117043)

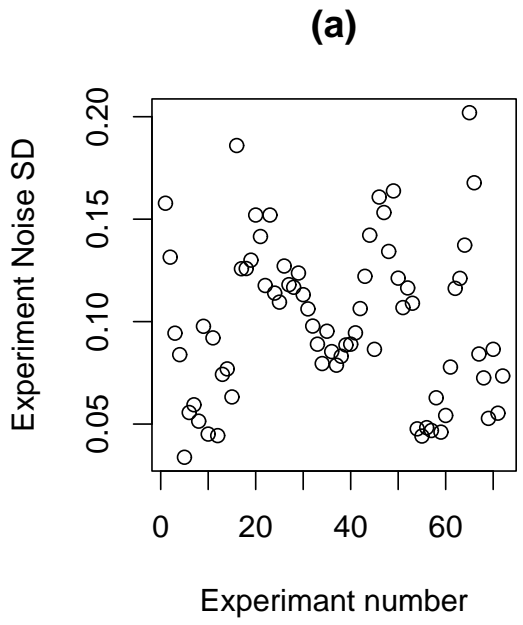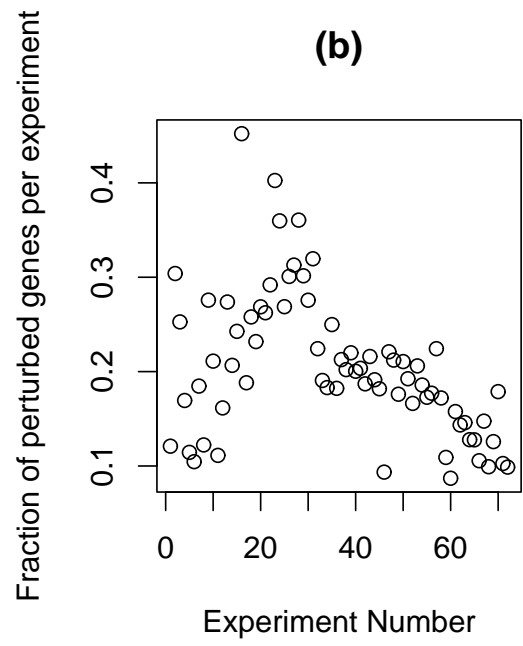

Figure 1:

Supplement: nar_30_13_2886__1.pdf [file nar_30_13_2886__1.pdf]

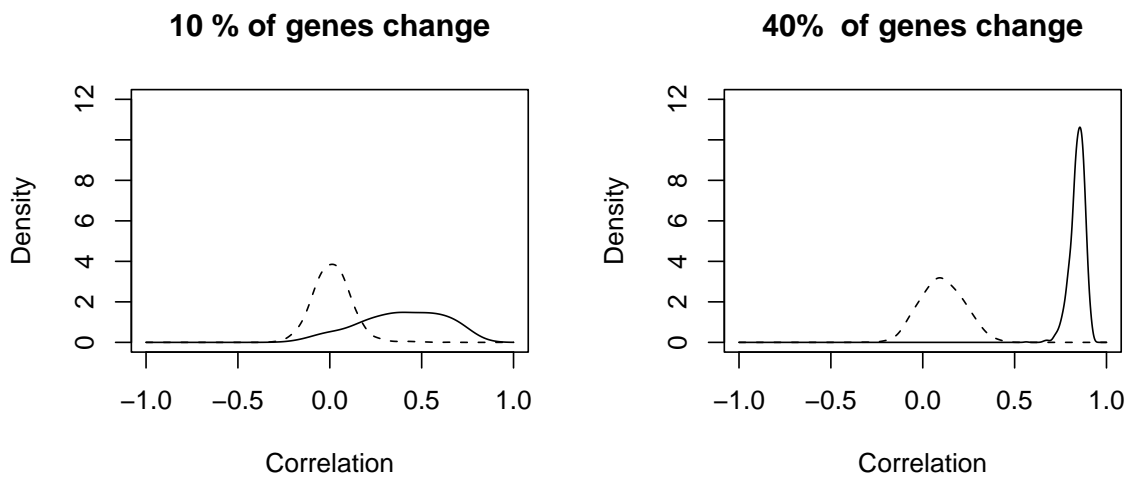

Figure 2:

Supplement: nar_30_13_2886__2.pdf [file nar_30_13_2886__2.pdf]

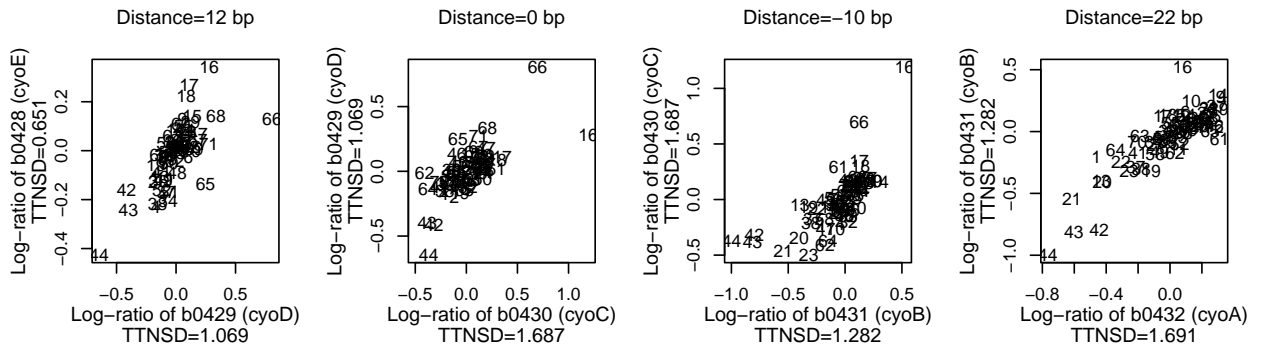

Figure 3:

Supplement: nar_30_13_2886__3.pdf [file nar_30_13_2886__3.pdf]

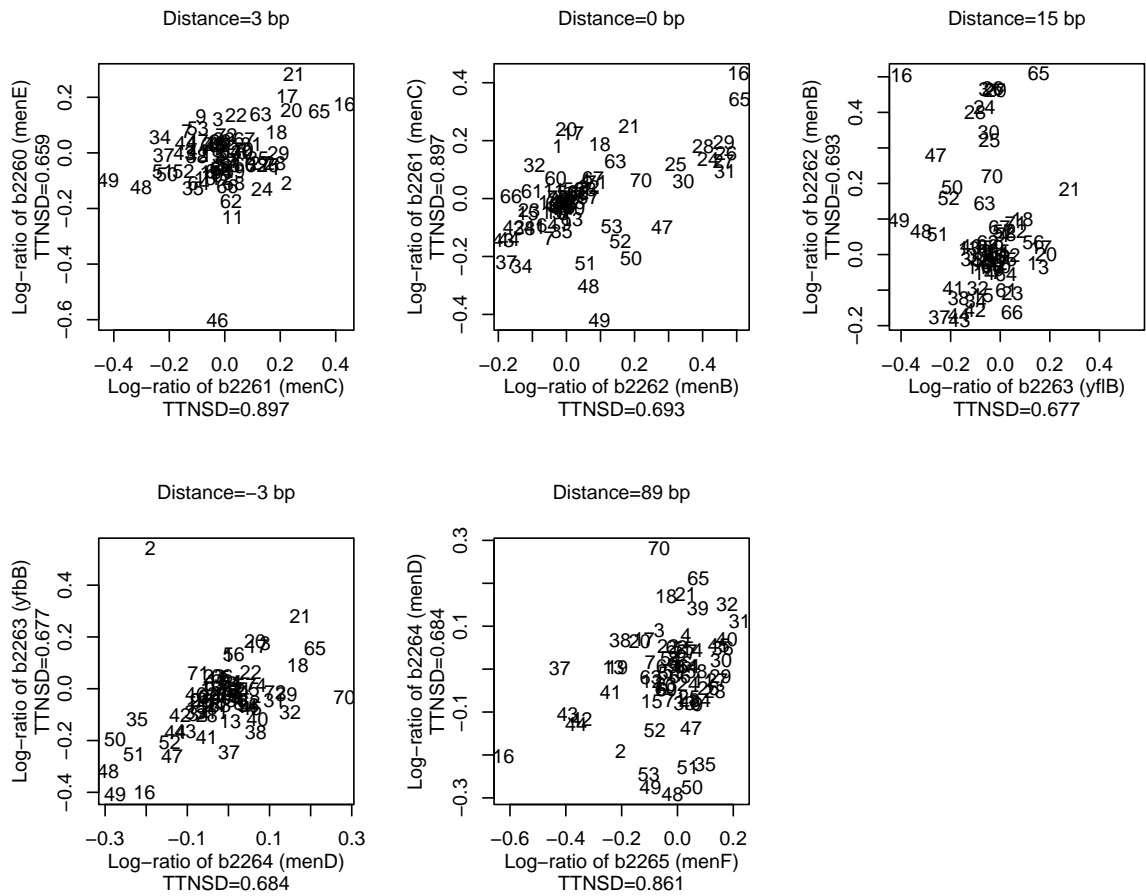

Figure 4:

Supplement: nar_30_13_2886__4.pdf [file nar_30_13_2886__4.pdf]
